# Supplementary material for: p62 filaments capture and present ubiquitinated cargos for autophagy
Source: PubMed Central journal article supplement (PMC5830917; doi:10.15252/embj.201798308), 2018-01-17

Figure 6 Source Data

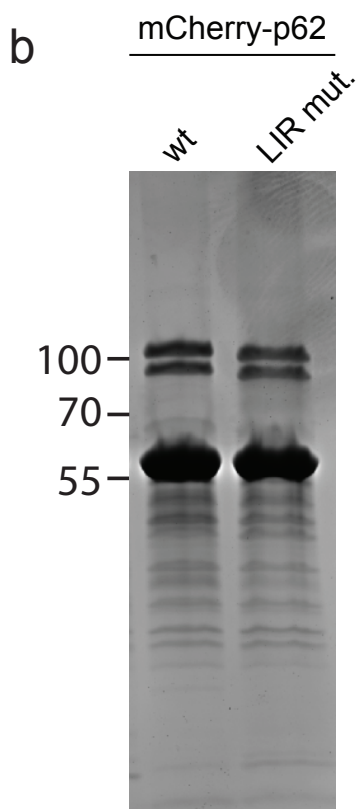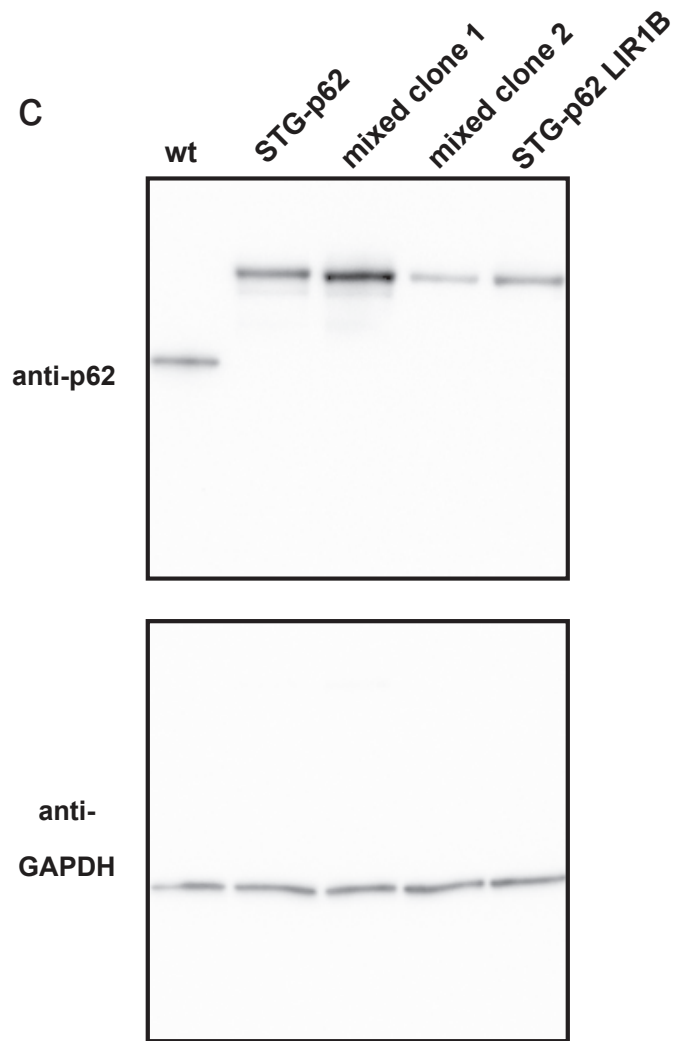

Supplement: EMBJ-37-e98308-s007.pdf [file EMBJ-37-e98308-s007.pdf]
